# Supplementary material for: Evolutionary Analysis of Respiratory Burst Oxidase Homolog (RBOH) Genes in Plants and Characterization of ZmRBOHs
Source: Int J Mol Sci. 2023 Feb 14;24(4):3858. doi: 10.3390/ijms24043858 (PMC9965149; doi:10.3390/ijms24043858)
Supplement: Supplementary file 1 [file ijms-24-03858-s001.zip]

Archive with 10 entries (10 files):
- Supplementary Figure S1.pdf
- Supplementary Figure S2.pdf
- Supplementary Figure S3.pdf
- Supplementary Figure S4.pdf
- Supplementary Figure S5.pdf
- Supplementary Figure S6.pdf
- Supplementary Table S1 Overview of genes encoding RBOH proteins in plants.xlsx
- Supplementary Table S2 Analysis and distribution of conserved motifs in RBOH proteins.xls
- Supplementary Table S3 Ka, Ks and KaKs calculation of duplicated RBOH genes.xlsx
- Supplementary Table S4 List of primers used for qRT expression analysis.xlsx
