# Supplementary material for: Evolutionary Analysis of Respiratory Burst Oxidase Homolog (RBOH) Genes in Plants and Characterization of ZmRBOHs
Source: Int J Mol Sci. 2023 Feb 14;24(4):3858. doi: 10.3390/ijms24043858 (PMC9965149; doi:10.3390/ijms24043858)
Supplement: Supplementary file 1 [file ijms-24-03858-s001.zip › Supplementary Table S1 Overview of genes encoding RBOH proteins in plants.xlsx]

## Sheet: Sheet1
Supplementary Table S1. Features of RBOH genes identified in 20 species examined.
Major lineage	Species	Gene name	Gene ID	Protein length	PI	MW	Site
Basal angiosperms	Amborella_trichopoda	AtrRBOH1	evm_27.TU.AmTr_v1.0_scaffold00006.155	896	9.1	102640	plas
	Amborella_trichopoda	AtrRBOH2	evm_27.TU.AmTr_v1.0_scaffold00007.336	924	9.08	104679	plas
	Amborella_trichopoda	AtrRBOH3	evm_27.TU.AmTr_v1.0_scaffold00016.300	917	9.2	103467	plas
	Amborella_trichopoda	AtrRBOH4	evm_27.TU.AmTr_v1.0_scaffold00023.119	862	9.49	98986.4	plas
	Amborella_trichopoda	AtrRBOH5	evm_27.TU.AmTr_v1.0_scaffold00066.13	857	9.35	98906	plas
Dicots	Arabidopsis_thaliana	AtRBOHB	AT1G09090	843	9.26	96390.2	plas
	Arabidopsis_thaliana	AtRBOHE	AT1G19230	934	9.02	105546	plas
	Arabidopsis_thaliana	AtRBOHF	AT1G64060	944	9.23	108418	plas
	Arabidopsis_thaliana	AtRBOHJ	AT3G45810	912	9.48	102937	plas
	Arabidopsis_thaliana	AtRBOHI	AT4G11230	941	8.71	106952	plas
	Arabidopsis_thaliana	AtRBOHG	AT4G25090	849	9.1	96862.5	plas
	Arabidopsis_thaliana	AtRBOHA	AT5G07390	902	9.26	102935	plas
	Arabidopsis_thaliana	AtRBOHD	AT5G47910	921	9.27	103909	plas
	Arabidopsis_thaliana	AtRBOHC	AT5G51060	905	9.5	102518	plas
	Arabidopsis_thaliana	AtRBOHH	AT5G60010	886	9.25	100628	plas
Monocots	Brachypodium_distachyon	BdRBOH1	Bradi2g12790	901	9.24	101582	plas
	Brachypodium_distachyon	BdRBOH2	Bradi2g19090	989	9.28	110417	plas
	Brachypodium_distachyon	BdRBOH3	Bradi2g22820	835	8.98	94104.4	plas
	Brachypodium_distachyon	BdRBOH4	Bradi2g49040	943	9.38	106370	plas
	Brachypodium_distachyon	BdRBOH5	Bradi2g54240	907	9.51	101554	plas
	Brachypodium_distachyon	BdRBOH6	Bradi3g37530	987	9.43	109808	plas
	Brachypodium_distachyon	BdRBOH7	Bradi4g05540	855	9.05	97128.5	plas
	Brachypodium_distachyon	BdRBOH8	Bradi4g17020	947	9.36	106695	plas
	Brachypodium_distachyon	BdRBOH9	Bradi4g31130	991	9.42	111113	plas
Dicots	Brassica_rapa	BrRBOH1	Brara.A01510	313	5.01	35642.3	nucl
	Brassica_rapa	BrRBOH2	Brara.B01052	883	9.26	100336	plas
	Brassica_rapa	BrRBOH3	Brara.B02679	925	8.46	104509	plas
	Brassica_rapa	BrRBOH4	Brara.B03414	679	8.65	77344.4	plas
	Brassica_rapa	BrRBOH5	Brara.C00291	835	9.11	94855.2	plas
	Brassica_rapa	BrRBOH6	Brara.C01498	910	9.47	103111	plas
	Brassica_rapa	BrRBOH7	Brara.E01502	668	8.19	76128.7	nucl
	Brassica_rapa	BrRBOH8	Brara.F01356	453	9.54	50621.6	nucl
	Brassica_rapa	BrRBOH9	Brara.F01836	877	9.22	99450.9	plas
	Brassica_rapa	BrRBOH10	Brara.F03043	680	8.4	76792.6	plas
	Brassica_rapa	BrRBOH11	Brara.I01360	948	9.21	108199	plas
	Brassica_rapa	BrRBOH12	Brara.I04749	317	8.68	35866.7	nucl
	Brassica_rapa	BrRBOH13	Brara.I05278	846	8.63	96770.2	plas
	Brassica_rapa	BrRBOH14	Brara.J02512	902	9.44	102740	plas
Dicots	Glycine_max	GmRBOH1	Glyma.01G222700	927	9.03	106074	plas
	Glycine_max	GmRBOH2	Glyma.03G236300	915	9.23	104524	plas
	Glycine_max	GmRBOH3	Glyma.04G203200	928	8.43	104993	plas
	Glycine_max	GmRBOH4	Glyma.05G021100	820	9.4	93129.4	plas
	Glycine_max	GmRBOH5	Glyma.05G198700	898	8.71	101110	plas
	Glycine_max	GmRBOH6	Glyma.05G212500	941	9.39	106634	plas
	Glycine_max	GmRBOH7	Glyma.06G162300	941	8.78	105688	plas
	Glycine_max	GmRBOH8	Glyma.07G130800	859	9.15	98227.2	plas
	Glycine_max	GmRBOH9	Glyma.08G005900	911	8.69	103143	plas
	Glycine_max	GmRBOH10	Glyma.08G018900	941	9.37	106831	plas
	Glycine_max	GmRBOH11	Glyma.09G073200	928	8.82	105299	plas
	Glycine_max	GmRBOH12	Glyma.10G152200	888	9.13	101258	plas
	Glycine_max	GmRBOH13	Glyma.11G020700	927	9.15	106009	plas
	Glycine_max	GmRBOH14	Glyma.15G182000	935	8.89	106032	plas
	Glycine_max	GmRBOH15	Glyma.17G078300	821	9.53	93201.5	plas
	Glycine_max	GmRBOH16	Glyma.19G233900	887	9.19	101250	plas
	Glycine_max	GmRBOH17	Glyma.20G236200	889	9.29	101188	plas
Bryophyta	Marchantia_polymorpha	MpRBOH1	Mapoly0046s0097	1008	8.91	113169	plas
	Marchantia_polymorpha	MpRBOH2	Mapoly0258s0001	1023	9.19	114897	plas
Monocots	Musa_acuminata	MaRBOH1	GSMUA_Achr10G03800_001	844	9.23	95289.9	plas
	Musa_acuminata	MaRBOH2	GSMUA_Achr10G12340_001	919	8.96	104078	plas
	Musa_acuminata	MaRBOH3	GSMUA_Achr10G17300_001	279	8.85	31001	nucl
	Musa_acuminata	MaRBOH4	GSMUA_Achr11G23900_001	524	9.53	59867.3	plas
	Musa_acuminata	MaRBOH5	GSMUA_Achr2G21340_001	834	8.91	93580.5	plas
	Musa_acuminata	MaRBOH6	GSMUA_Achr3G05840_001	890	9	100266	plas
	Musa_acuminata	MaRBOH7	GSMUA_Achr5G26970_001	834	9.26	94498	plas
	Musa_acuminata	MaRBOH8	GSMUA_Achr5G29250_001	722	8.87	82329	plas
	Musa_acuminata	MaRBOH9	GSMUA_Achr5G29260_001	98	10.28	11144	mito
	Musa_acuminata	MaRBOH10	GSMUA_Achr6G11770_001	402	8.35	45425.9	chlo
	Musa_acuminata	MaRBOH11	GSMUA_Achr6G16270_001	861	9.08	97407.6	plas
	Musa_acuminata	MaRBOH12	GSMUA_Achr6G31850_001	892	9.33	101296	plas
	Musa_acuminata	MaRBOH13	GSMUA_Achr8G23680_001	891	9.48	100631	plas
	Musa_acuminata	MaRBOH14	GSMUA_Achr9G05450_001	871	9.13	99519.6	plas
Basal angiosperms	Nymphaea_colorata	NcRBOH1	Nycol.B01908	902	9.15	101840	plas
	Nymphaea_colorata	NcRBOH2	Nycol.B01992	908	8.33	103785	plas
	Nymphaea_colorata	NcRBOH3	Nycol.E00478	860	9.33	97961.1	plas
	Nymphaea_colorata	NcRBOH4	Nycol.G00845	908	9.18	102346	plas
	Nymphaea_colorata	NcRBOH5	Nycol.K00977	939	8.75	106356	plas
Monocots	Oryza_sativa	OsRBOH1	LOC_Os01g25820	905	9.33	101759	plas
	Oryza_sativa	OsRBOH2	LOC_Os01g53294	727	9.05	83410.9	plas
	Oryza_sativa	OsRBOH3	LOC_Os01g61880	843	9.38	94790.1	plas
	Oryza_sativa	OsRBOH4	LOC_Os05g38980	819	9.18	92349.6	plas
	Oryza_sativa	OsRBOH5	LOC_Os05g45210	951	9.35	107171	plas
	Oryza_sativa	OsRBOH6	LOC_Os08g35210	1033	9.84	115014	plas
	Oryza_sativa	OsRBOH7	LOC_Os09g26660	1007	9.46	112134	plas
	Oryza_sativa	OsRBOH8	LOC_Os11g33120	936	9.24	105185	plas
	Oryza_sativa	OsRBOH9	LOC_Os12g35610	909	9.2	102123	plas
Bryophyta	Physcomitrella_patens	PpRBOH1	Pp3c10_24760	973	8.52	109805	plas
	Physcomitrella_patens	PpRBOH2	Pp3c19_18750	205	8.93	23357.3	plas
	Physcomitrella_patens	PpRBOH3	Pp3c20_22940	960	8.74	108811	plas
	Physcomitrella_patens	PpRBOH4	Pp3c23_10130	917	9.07	104464	plas
	Physcomitrella_patens	PpRBOH5	Pp3c24_2840	952	9.14	107883	plas
Gymnosperm	Pinus_taeda	PtaRBOH1	PITA_000006695	968	8.98	108565	plas
	Pinus_taeda	PtaRBOH2	PITA_000007241	914	9	103997	plas
	Pinus_taeda	PtaRBOH3	PITA_000028249	967	9.33	110074	plas
	Pinus_taeda	PtaRBOH4	PITA_000079771	642	8.32	73576.6	plas
	Pinus_taeda	PtaRBOH5	PITA_000085516	851	9.22	96160.5	plas
	Pinus_taeda	PtaRBOH6	PITA_000087113	594	9.03	66788.5	plas
Dicots	Populus_trichocarpa	PtRBOH1	Potri.001G070900	926	9.1	104102	plas
	Populus_trichocarpa	PtRBOH2	Potri.001G098300	949	9.36	107739	plas
	Populus_trichocarpa	PtRBOH3	Potri.003G133300	948	9.41	107579	plas
	Populus_trichocarpa	PtRBOH4	Potri.003G159800	926	9.32	104304	plas
	Populus_trichocarpa	PtRBOH5	Potri.005G026200	887	9.17	101083	plas
	Populus_trichocarpa	PtRBOH6	Potri.006G097200	846	9.33	96712.1	plas
	Populus_trichocarpa	PtRBOH7	Potri.006G137300	926	9.29	105426	nucl
	Populus_trichocarpa	PtRBOH8	Potri.012G111600	909	9.15	102997	plas
	Populus_trichocarpa	PtRBOH9	Potri.015G109800	909	9.21	102784	plas
	Populus_trichocarpa	PtRBOH10	Potri.016G112200	852	9.41	97739.5	plas
Pteridophyta	Selaginella_moellendorffii	SmRBOH1	74260	711	8.96	80967.5	plas
	Selaginella_moellendorffii	SmRBOH2	81185	715	8.79	81809.2	plas
	Selaginella_moellendorffii	SmRBOH3	92554	693	9.26	79638.3	plas
	Selaginella_moellendorffii	SmRBOH4	97417	895	9.46	101057	plas
	Selaginella_moellendorffii	SmRBOH5	101139	901	9.33	102941	plas
	Selaginella_moellendorffii	SmRBOH6	110111	810	9.34	91780.5	plas
	Selaginella_moellendorffii	SmRBOH7	183259	819	9.5	93168.9	plas
	Selaginella_moellendorffii	SmRBOH8	403353	845	9.14	96907.8	plas
	Selaginella_moellendorffii	SmRBOH9	412004	734	9.04	84055.4	plas
Monocots	Setaria_italica	SiRBOH1	Seita.2G216800	1010	9.21	111944	plas
	Setaria_italica	SiRBOH2	Seita.3G170600	963	9.34	108248	plas
	Setaria_italica	SiRBOH3	Seita.3G343100	896	9.37	99770.6	plas
	Setaria_italica	SiRBOH4	Seita.5G164400	899	9.21	101565	plas
	Setaria_italica	SiRBOH5	Seita.5G182900	823	9.28	93334.8	plas
	Setaria_italica	SiRBOH6	Seita.5G307900	958	9.27	107746	plas
	Setaria_italica	SiRBOH7	Seita.5G372100	848	9.49	95934.7	plas
	Setaria_italica	SiRBOH8	Seita.6G075000	705	8.88	80216.2	plas
	Setaria_italica	SiRBOH9	Seita.6G170500	1009	9.59	111838	plas
	Setaria_italica	SiRBOH10	Seita.8G129100	953	8.98	106891	plas
	Setaria_italica	SiRBOH11	Seita.8G141900	931	9.36	104859	plas
	Setaria_italica	SiRBOH12	Seita.8G184400	819	8.46	93918.1	plas
	Setaria_italica	SiRBOH13	Seita.8G185000	858	8.79	97400.8	plas
Dicots	Solanum_lycopersicum	SlRBOH1	Solyc01g099620	865	8.92	98730.4	plas
	Solanum_lycopersicum	SlRBOH2	Solyc03g117980	938	9.13	105307	plas
	Solanum_lycopersicum	SlRBOH3	Solyc05g025680	853	8.6	97194.9	plas
	Solanum_lycopersicum	SlRBOH4	Solyc06g068680	857	9.09	97729.6	plas
	Solanum_lycopersicum	SlRBOH5	Solyc06g075570	830	9.11	95392.7	plas
	Solanum_lycopersicum	SlRBOH6	Solyc07g042460	970	8.78	109733	plas
	Solanum_lycopersicum	SlRBOH7	Solyc08g081690	963	9.14	109078	plas
Dicots	Solanum_tuberosum	StRBOH1	Soltu.DM.01G039320	867	9.15	99026.8	plas
	Solanum_tuberosum	StRBOH2	Soltu.DM.03G032210	938	8.99	105199	plas
	Solanum_tuberosum	StRBOH3	Soltu.DM.05G014560	865	8.51	98505.3	plas
	Solanum_tuberosum	StRBOH4	Soltu.DM.06G024560	1461	7.7	163585	plas
	Solanum_tuberosum	StRBOH5	Soltu.DM.06G024580	1416	8.65	158015	plas
	Solanum_tuberosum	StRBOH6	Soltu.DM.06G031030	881	9.14	101294	plas
	Solanum_tuberosum	StRBOH7	Soltu.DM.08G028440	963	9.2	109146	plas
	Solanum_tuberosum	StRBOH8	Soltu.DM.11G026220	745	9.08	85603.8	plas
Monocots	Sorghum_bicolor	SbRBOH1	Sobic.002G214200	1007	9.11	112077	plas
	Sorghum_bicolor	SbRBOH2	Sobic.003G161500	924	9.26	103925	plas
	Sorghum_bicolor	SbRBOH3	Sobic.003G175000	827	9.38	93653.1	plas
	Sorghum_bicolor	SbRBOH4	Sobic.003G200000	117	4.86	13031.4	nucl
	Sorghum_bicolor	SbRBOH5	Sobic.003G287400	944	9.29	106568	plas
	Sorghum_bicolor	SbRBOH6	Sobic.003G347520	854	9.42	96546.7	plas
	Sorghum_bicolor	SbRBOH7	Sobic.005G139700	1079	9.57	120570	plas
	Sorghum_bicolor	SbRBOH8	Sobic.007G148300	1008	9.6	112949	plas
	Sorghum_bicolor	SbRBOH9	Sobic.008G118700	916	8.94	101764	plas
	Sorghum_bicolor	SbRBOH10	Sobic.009G206500	957	9.43	107461	plas
Dicots	Theobroma_cacao	TcRBOH1	Thecc.03G101700	737	9.37	84877.2	plas
	Theobroma_cacao	TcRBOH2	Thecc.03G143500	910	9.12	102712	plas
	Theobroma_cacao	TcRBOH3	Thecc.03G287500	932	9.24	106123	plas
	Theobroma_cacao	TcRBOH4	Thecc.05G312200	889	9.37	101150	plas
	Theobroma_cacao	TcRBOH5	Thecc.08G026200	927	9.2	104245	plas
	Theobroma_cacao	TcRBOH6	Thecc.09G071200	936	9.23	106236	plas
	Theobroma_cacao	TcRBOH7	Thecc.09G332900	911	9.41	103403	plas
Dicots	Vitis_vinifera	VvRBOH1	VIT_201s0150g00440	924	9.1	104365	plas
	Vitis_vinifera	VvRBOH2	VIT_201s0150g00450	681	9.13	77235.2	plas
	Vitis_vinifera	VvRBOH3	VIT_202s0025g00510	943	9.32	106991	plas
	Vitis_vinifera	VvRBOH4	VIT_211s0016g00540	917	9.26	103810	plas
	Vitis_vinifera	VvRBOH5	VIT_214s0060g02320	918	9.38	104785	plas
	Vitis_vinifera	VvRBOH6	VIT_219s0014g02830	840	6.47	95402.8	plas
Monocots	Zea_mays	ZmRBOH1	Zm00001d007421	948	9.26	105990	plas
	Zea_mays	ZmRBOH2	Zm00001d007426	995	9.21	111958	plas
	Zea_mays	ZmRBOH3	Zm00001d007430	822	9.34	92808.9	plas
	Zea_mays	ZmRBOH4	Zm00001d009248	897	9.24	101270	plas
	Zea_mays	ZmRBOH5	Zm00001d009349	822	9.38	92760.1	plas
	Zea_mays	ZmRBOH6	Zm00001d020609	709	9.13	78236.4	plas
	Zea_mays	ZmRBOH7	Zm00001d023859	902	9.04	100473	plas
	Zea_mays	ZmRBOH8	Zm00001d032079	976	9.49	108970	plas
	Zea_mays	ZmRBOH9	Zm00001d038762	948	9.42	106888	plas
	Zea_mays	ZmRBOH10	Zm00001d040805	899	9.42	101548	plas
	Zea_mays	ZmRBOH11	Zm00001d040974	842	9.33	95014.8	plas
	Zea_mays	ZmRBOH12	Zm00001d042961	883	9.41	99425	plas
	Zea_mays	ZmRBOH13	Zm00001d043543	943	9.28	106345	plas
	Zea_mays	ZmRBOH14	Zm00001d044337	318	5.23	37180.5	nucl
	Zea_mays	ZmRBOH15	Zm00001d052653	971	9.42	108848	plas
