# Supplementary material for: Evolutionary Analysis of Respiratory Burst Oxidase Homolog (RBOH) Genes in Plants and Characterization of ZmRBOHs
Source: Int J Mol Sci. 2023 Feb 14;24(4):3858. doi: 10.3390/ijms24043858 (PMC9965149; doi:10.3390/ijms24043858)
Supplement: Supplementary file 1 [file ijms-24-03858-s001.zip › Supplementary Table S2 Analysis and distribution of conserved motifs in RBOH proteins.xls]

## Sheet: Zea_mays
Supplementary Table S2 Analysis and distribution of conserved motifs in ZmRBOH proteins.
Motif	Width	Best possible match
1	80	RAQYFLEENWKRVWVLALWLAICAGLFAWKFIQYRRRAVFQVMGYCVCVAKGAAETLKLNMALILLPVCRNTJTWJRSTT
2	82	GVIELHNYCTSVYEEGDARSALIAMLQSLNHAKHGVDIVSGTRVRTHFARPNWRKVFKRIASNHQNQRVGVFYCGSPVLTKE
3	57	PLKRLTGFNAFWYSHHLFVIVYALLVVHGYFLYLTHKWYKKTTWMYLAVPVVLYACE
4	66	NVLSLHMSKPPGFRYKSGQYIFVNCPAVSPFEWHPFSITSAPGDDYLSVHIRTLGDWTSELRNVFS
5	57	DRITKEELKEFWEQISDQSFDSRLQIFFDMVDKNADGRITEEEVKEIIVLSASANKL
6	57	RFPKVLIDGPYGAPAQDYRKYDVLLLVGLGIGATPFISILKDLLNNIKQLEEEEEAE
7	44	VPFDDNINFHKVIAAGIAVGVALHAGAHLTCDFPRLJAASDAAY
8	29	RAYFYWVTREQGSFEWFKGVMNEVAETDK
9	41	PPNYWWLVKGTEGWTGIVMVVLMAVAFTLATPWFRRGELKL
10	29	KEQAEEYAALIMEELDPDNLGYIELWQLE

## Sheet: others species
Supplementary Table S2. Analysis and distribution of conserved motifs in RBOH proteins of 20 species .
Motif	Width	Best possible match
1	48	ALHMSKPPGFKYKSGQYIFVNCPAVSPFEWHPFSITSAPGDDYLSVHI
2	41	AFQVMGYCVCTAKGAAETLKLNMALILLPVCRNTITWLRST
3	41	PKLLIDGPYGAPAQDYKKYDVLLLVGLGIGATPFISILKDJ
4	41	IEMHNYLTSVYEEGDARSALITMLQSLNHAKNGVDIVSGTR
5	36	TGFNAFWYSHHLFVIVYVLLIVHGYFLYLTKKWYKK
6	37	VVPFDDNINFHKVIAAAIAVGVGLHAGAHLTCDFPRL
7	41	RRITGDSITKEELKEFWEQISDQSFDSRLQIFFDMVDKBAD
8	29	RAYFYWVTREQGSFEWFKGVMNEVAEMDK
9	31	KLSNIQKQAEEYAALIMEELDPDDTGYIMID
10	41	EVKEIIMLSASANKLSKJKEQAEEYAALIMEELDPDNLGYI
