# Supplementary material for: Evolutionary Analysis of Respiratory Burst Oxidase Homolog (RBOH) Genes in Plants and Characterization of ZmRBOHs
Source: Int J Mol Sci. 2023 Feb 14;24(4):3858. doi: 10.3390/ijms24043858 (PMC9965149; doi:10.3390/ijms24043858)
Supplement: Supplementary file 1 [file ijms-24-03858-s001.zip › Supplementary Table S3 Ka, Ks and KaKs calculation of duplicated RBOH genes.xlsx]

## Sheet: Sheet1
Supplementary Table S3. Ka, Ks and Ka/Ks calculation of duplicated RBOH genes
ZmRhobsGeneName	OthersRhobsGenename	Ka	Ks	Ka/Ks	SelectionPressure
ZmRBOH12	AtRBOHH	0.317842	NaN	NaN	NaN
ZmRBOH1	AtrRBOH3	0.277095	NaN	NaN	NaN
ZmRBOH1	BdRBOH8	0.177771	0.493118	0.360503	Purifying selection
ZmRBOH4	BdRBOH1	0.064068	0.642743	0.0996789	Purifying selection
ZmRBOH6	BdRBOH9	0.0893165	0.318457	0.280467	Purifying selection
ZmRBOH7	BdRBOH7	0.107679	0.66823	0.161141	Purifying selection
ZmRBOH8	BdRBOH6	0.0997589	0.506232	0.197062	Purifying selection
ZmRBOH8	BdRBOH9	0.116719	0.689253	0.169341	Purifying selection
ZmRBOH9	BdRBOH2	0.0477567	0.532224	0.0897305	Purifying selection
ZmRBOH9	BdRBOH4	0.0811737	0.792554	0.10242	Purifying selection
ZmRBOH10	BdRBOH1	0.0592962	0.65888	0.0899954	Purifying selection
ZmRBOH12	BdRBOH3	0.148606	0.853026	0.174211	Purifying selection
ZmRBOH12	BdRBOH5	0.0568335	0.499673	0.113741	Purifying selection
ZmRBOH13	BdRBOH4	0.0490545	0.555898	0.0882438	Purifying selection
ZmRBOH13	BdRBOH2	0.0796709	0.768819	0.103628	Purifying selection
ZmRBOH15	BdRBOH8	0.116165	0.449828	0.258242	Purifying selection
ZmRBOH12	BrRBOH9	0.325473	NaN	NaN	NaN
ZmRBOH1	GmRBOH3	0.323236	NaN	NaN	NaN
ZmRBOH1	GmRBOH7	0.312827	NaN	NaN	NaN
ZmRBOH1	GmRBOH9	0.340829	NaN	NaN	NaN
ZmRBOH8	GmRBOH14	0.280462	NaN	NaN	NaN
ZmRBOH10	GmRBOH12	0.261796	NaN	NaN	NaN
ZmRBOH1	MaRBOH2	0.222352	0.902033	0.246502	Purifying selection
ZmRBOH1	MaRBOH11	0.220026	0.859347	0.256038	Purifying selection
ZmRBOH8	MaRBOH13	0.150377	1.08809	0.138203	Purifying selection
ZmRBOH12	MaRBOH1	0.17779	1.45112	0.122519	Purifying selection
ZmRBOH12	MaRBOH4	0.177829	3.24643	0.0547768	Purifying selection
ZmRBOH12	MaRBOH8	0.135427	3.859	0.0350939	Purifying selection
ZmRBOH15	MaRBOH2	0.167124	0.820273	0.203742	Purifying selection
ZmRBOH15	MaRBOH11	0.187764	0.798359	0.235187	Purifying selection
ZmRBOH1	NcRBOH4	0.293163	1.22552	0.239215	Purifying selection
ZmRBOH1	OsRBOH8	0.146755	0.527448	0.278236	Purifying selection
ZmRBOH4	OsRBOH1	0.0699184	0.772389	0.0905223	Purifying selection
ZmRBOH6	OsRBOH7	0.102378	0.397926	0.25728	Purifying selection
ZmRBOH7	OsRBOH9	0.135886	0.433419	0.313521	Purifying selection
ZmRBOH8	OsRBOH6	0.093341	0.492033	0.189705	Purifying selection
ZmRBOH8	OsRBOH7	0.107894	0.672223	0.160504	Purifying selection
ZmRBOH9	OsRBOH2	0.04458	0.799592	0.0557535	Purifying selection
ZmRBOH9	OsRBOH5	0.047144	0.506639	0.0930525	Purifying selection
ZmRBOH10	OsRBOH1	0.0657767	0.711612	0.0924334	Purifying selection
ZmRBOH12	OsRBOH3	0.0548921	0.568007	0.0966399	Purifying selection
ZmRBOH12	OsRBOH4	0.122062	1.11888	0.109093	Purifying selection
ZmRBOH13	OsRBOH2	0.0286504	0.607829	0.0471356	Purifying selection
ZmRBOH13	OsRBOH5	0.0694393	0.786995	0.0882335	Purifying selection
ZmRBOH15	OsRBOH8	0.0774945	0.447819	0.173049	Purifying selection
ZmRBOH1	PtRBOH4	0.298732	NaN	NaN	NaN
ZmRBOH1	PtRBOH8	0.272725	NaN	NaN	NaN
ZmRBOH1	PtRBOH9	0.284798	NaN	NaN	NaN
ZmRBOH8	PtRBOH7	0.275421	NaN	NaN	NaN
ZmRBOH15	PtRBOH1	0.251808	NaN	NaN	NaN
ZmRBOH15	PtRBOH4	0.243366	NaN	NaN	NaN
ZmRBOH1	SbRBOH7	0.102226	0.32478	0.314755	Purifying selection
ZmRBOH4	SbRBOH2	0.0251018	0.150838	0.166416	Purifying selection
ZmRBOH6	SbRBOH1	0.0342798	0.121699	0.281678	Purifying selection
ZmRBOH7	SbRBOH9	0.032865	0.176776	0.185913	Purifying selection
ZmRBOH8	SbRBOH1	0.134657	0.71204	0.189114	Purifying selection
ZmRBOH8	SbRBOH8	0.0377707	0.212798	0.177495	Purifying selection
ZmRBOH9	SbRBOH5	0.0834318	0.837098	0.0996679	Purifying selection
ZmRBOH9	SbRBOH10	0.00818116	0.145173	0.0563546	Purifying selection
ZmRBOH10	SbRBOH2	0.0184754	0.159999	0.115472	Purifying selection
ZmRBOH12	SbRBOH6	0.0150994	0.174699	0.0864313	Purifying selection
ZmRBOH13	SbRBOH5	0.00677074	0.0834084	0.0811757	Purifying selection
ZmRBOH13	SbRBOH10	0.0820654	0.828547	0.0990474	Purifying selection
ZmRBOH15	SbRBOH7	0.040249	0.305363	0.131807	Purifying selection
ZmRBOH1	SiRBOH11	0.118843	0.333372	0.356488	Purifying selection
ZmRBOH4	SiRBOH4	0.0438245	0.398861	0.109874	Purifying selection
ZmRBOH6	SiRBOH1	0.0396712	0.194195	0.204285	Purifying selection
ZmRBOH7	SiRBOH3	0.0570779	0.298063	0.191496	Purifying selection
ZmRBOH8	SiRBOH1	0.125877	0.69294	0.181657	Purifying selection
ZmRBOH8	SiRBOH9	0.0508283	0.350889	0.144856	Purifying selection
ZmRBOH9	SiRBOH2	0.015708	0.283209	0.0554643	Purifying selection
ZmRBOH9	SiRBOH6	0.0787423	0.804774	0.097844	Purifying selection
ZmRBOH10	SiRBOH4	0.0320164	0.379779	0.0843027	Purifying selection
ZmRBOH11	SiRBOH5	0.0409749	0.508036	0.0806535	Purifying selection
ZmRBOH12	SiRBOH7	0.0300832	0.358171	0.0839912	Purifying selection
ZmRBOH13	SiRBOH2	0.0830708	0.699094	0.118826	Purifying selection
ZmRBOH13	SiRBOH6	0.0143074	0.253315	0.0564805	Purifying selection
ZmRBOH15	SiRBOH11	0.0517058	0.313871	0.164736	Purifying selection
ZmRBOH12	SlRBOH5	0.268363	NaN	NaN	NaN
ZmRBOH12	StRBOH6	0.298829	NaN	NaN	NaN
ZmRBOH1	TcRBOH2	0.29932	NaN	NaN	NaN
ZmRBOH8	TcRBOH6	0.266627	NaN	NaN	NaN
ZmRBOH12	TcRBOH7	0.311262	NaN	NaN	NaN
ZmRBOH1	VvRBOH1	0.286926	NaN	NaN	NaN
ZmRBOH3	VvRBOH2	0.358446	NaN	NaN	NaN
ZmRBOH8	VvRBOH4	0.243295	NaN	NaN	NaN
ZmRBOH15	VvRBOH1	0.252681	NaN	NaN	NaN
NaN: No result.
