# Supplementary material for: Evolutionary Analysis of Respiratory Burst Oxidase Homolog (RBOH) Genes in Plants and Characterization of ZmRBOHs
Source: Int J Mol Sci. 2023 Feb 14;24(4):3858. doi: 10.3390/ijms24043858 (PMC9965149; doi:10.3390/ijms24043858)
Supplement: Supplementary file 1 [file ijms-24-03858-s001.zip › Supplementary Table S4 List of primers used for qRT expression analysis.xlsx]

## Sheet: Sheet1
Supplementary Table S4. qRT-PCR primers used to detect the expression of RBOH genes in maize
Gene ID	Primer sequence
	Forward sequence (5’-3’)	Reverse sequence (5’-3’)
ZmRBOH1	CACTCATCACCATGATCCAGTC	GAGAATTCCTGCGCAAGTTTG
ZmRBOH2	CCATGATCCAGTCGTTCAACTA	TGAGAATTCCTGCGTGAGTTC
ZmRBOH3	GACTGCAGACTTTCTTCCACAT	TGATCTTCGACAGCTTGTTCTC
ZmRBOH4	TTTTACGGCACAAATGAGTCAG	TTTTGAGCAAACTTACGGAAGG
ZmRBOH5	GTCTTCATAGATGGTCCCTACG	TAACCCAGTAGAAGTAGGCTCT
ZmRBOH6	CTTCAACGCCTTCTGGTACTC	CTGTTCAGACGTCTTCTCGTAC
ZmRBOH7	GAATGTCATCGCCATTCACATG	GATGTGCATGCTCAGGTAGTC
ZmRBOH8	CAGGACTTCAGGAACTACGAC	TTGATGTTGTTGAGGAGGTCTC
ZmRBOH9	ATCGAAGGTTCAAGAGCACATA	TATGTGTCCTACATCACGCTAC
ZmRBOH10	AGGTCCATTTTACCACTACTGG	CCATGATGTGAAATACAGCTCG
ZmRBOH11	CATCATAAAGGCGGCAATCTAC	CCAATCACCTAACGTACGGATA
ZmRBOH12	CCAAACTGGAGGAAGGTATTCT	ATCCTTCAGTTGTTTTGTGAGC
ZmRBOH13	CTTGGAAGTTCATGCAGTATCG	TTCCCTGCATGGAGGATTATAC
ZmRBOH14	AATACTTGCATGATGATTGGGC	TTTACCTTTTGCTTTCTCGTGG
ZmRBOH15	GAACAAGCTTTCGAAGATCACG	CAGGTTGTACAGCTCGATGTAG
