# Supplementary figures and images for: Evolutionary Analysis of Respiratory Burst Oxidase Homolog (RBOH) Genes in Plants and Characterization of ZmRBOHs
Source: MDPI journal article supplement (doi:10.3390/ijms24043858), 2023-02-14

**Figure S1.** Conserved domains in RBOH proteins of 20 species.

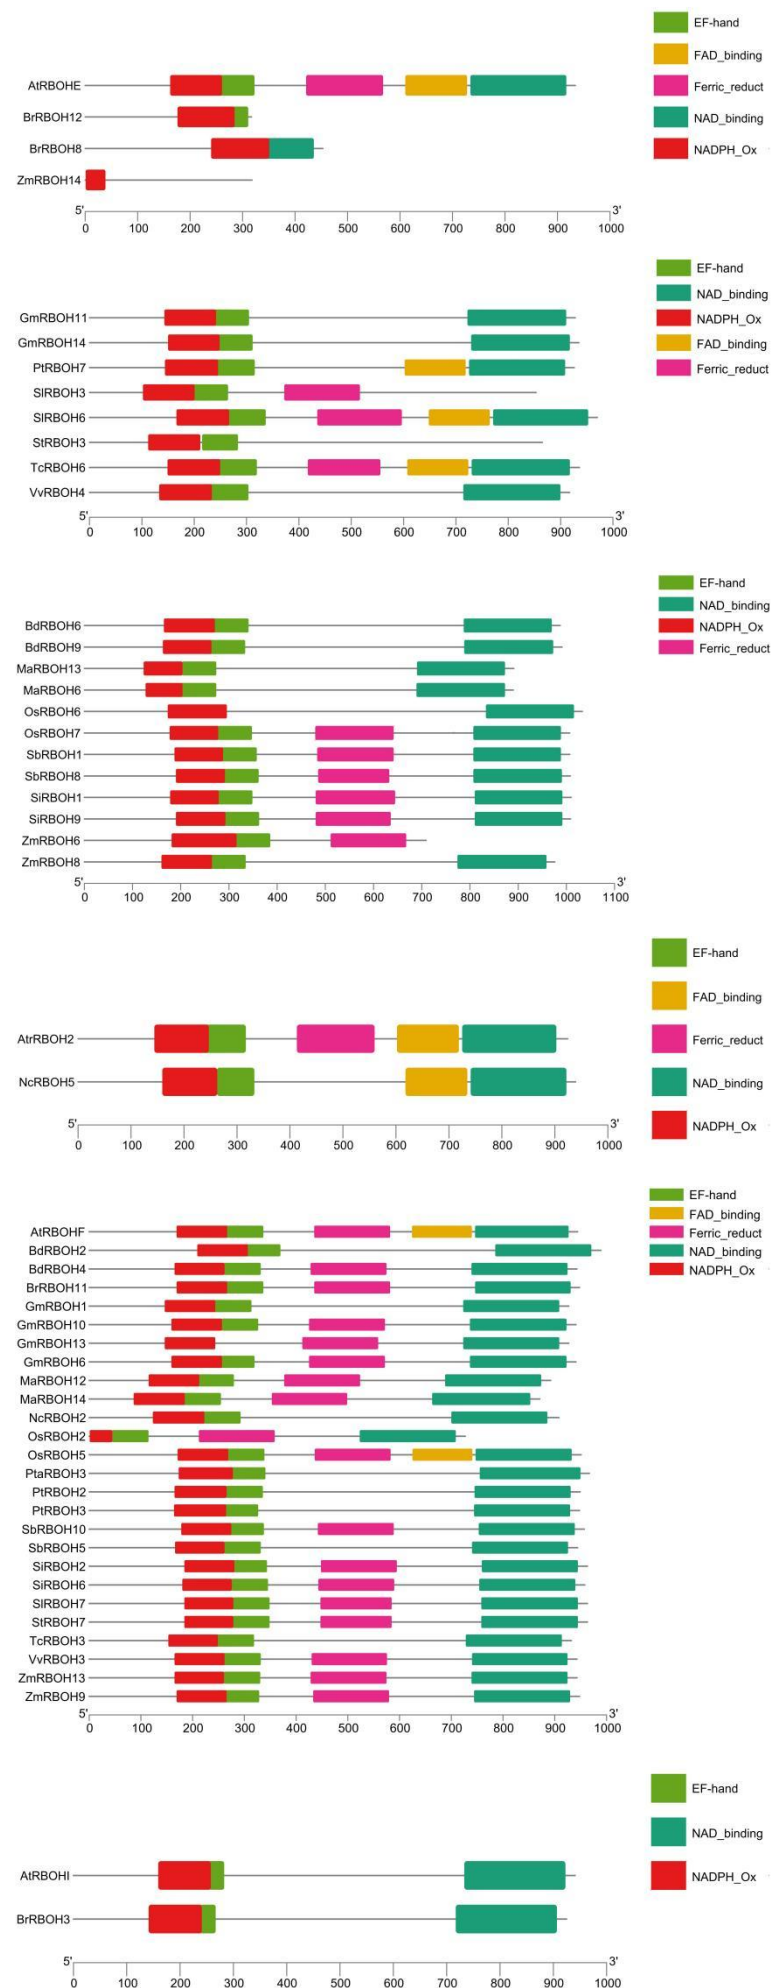

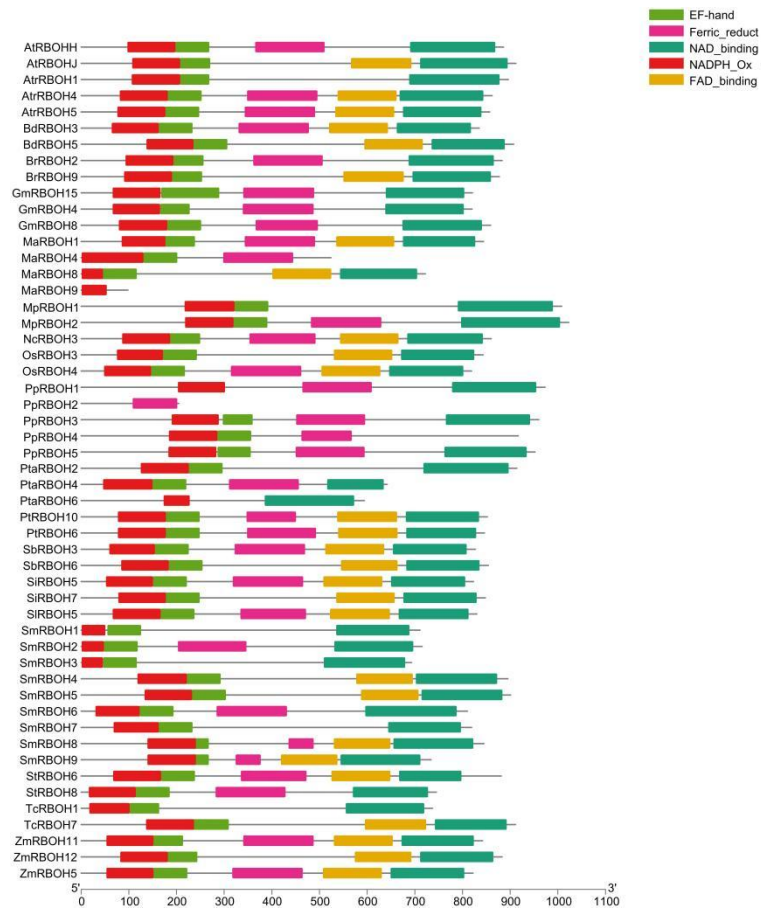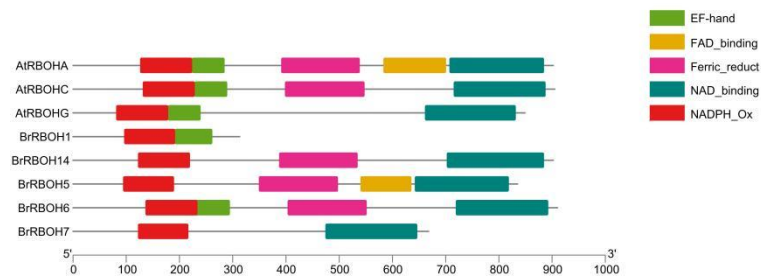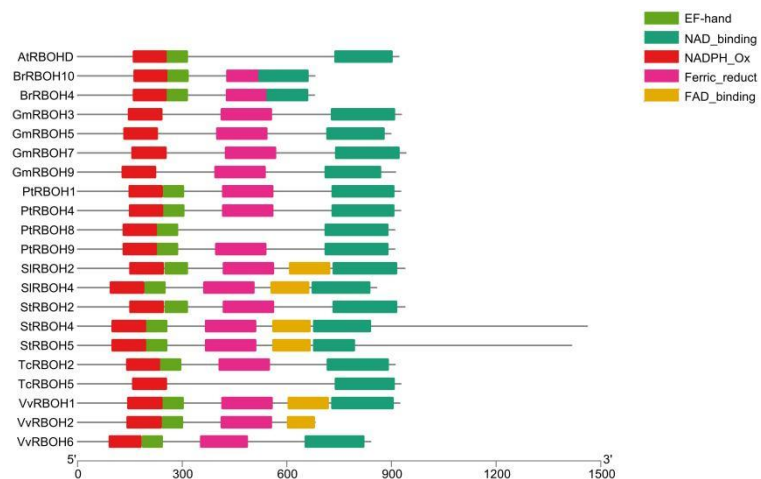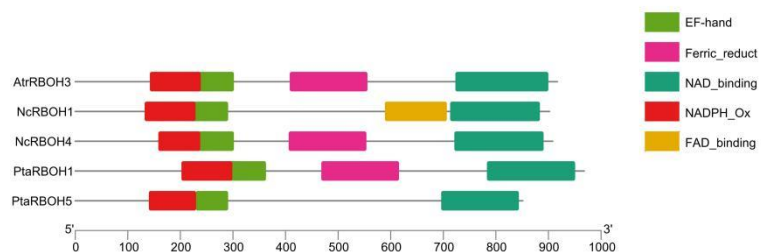

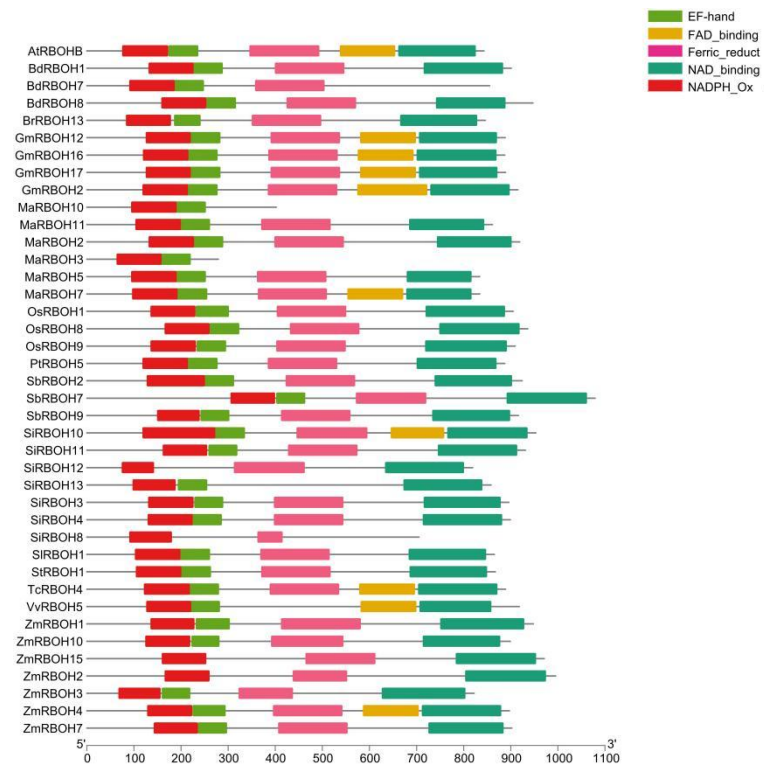

Supplement: s1 [file s1]

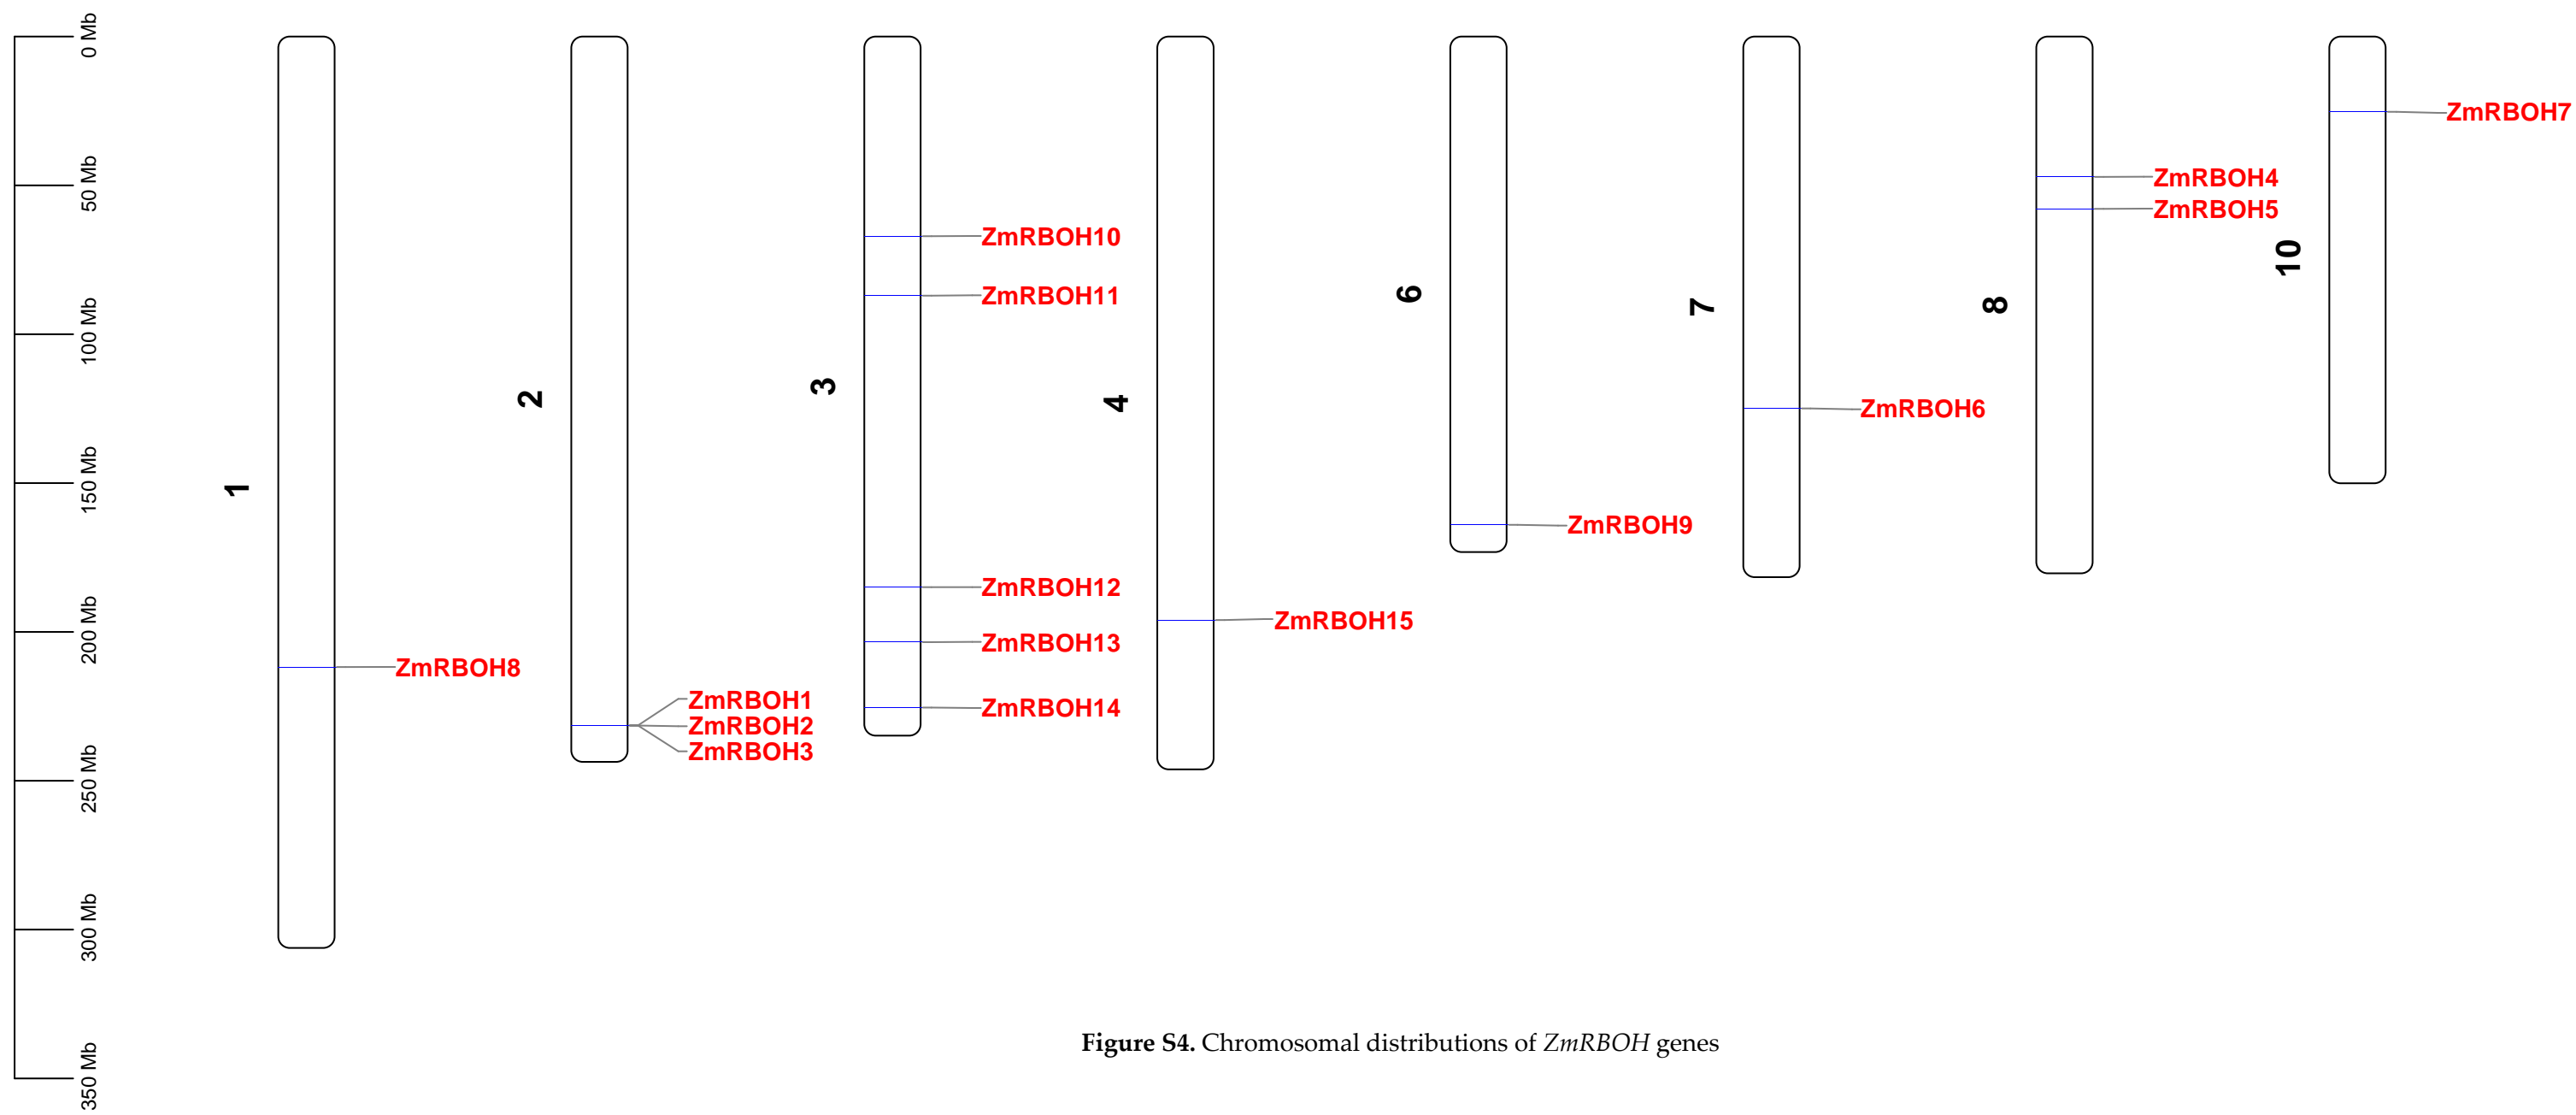

**Figure S4.** Chromosomal distributions of *ZmRBOH* genes

Supplement: s1 [file s1]

**Figure S2.** Heatmaps of RBOH genes in different species in each of the five subgroups.

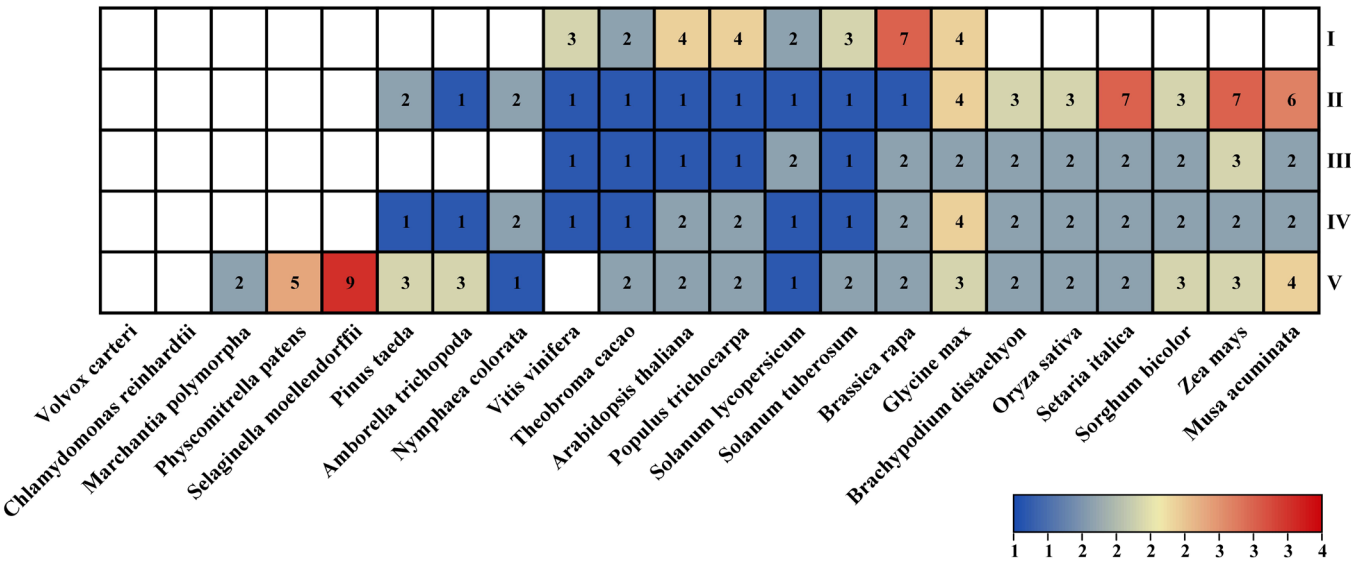

Supplement: s1 [file s1]

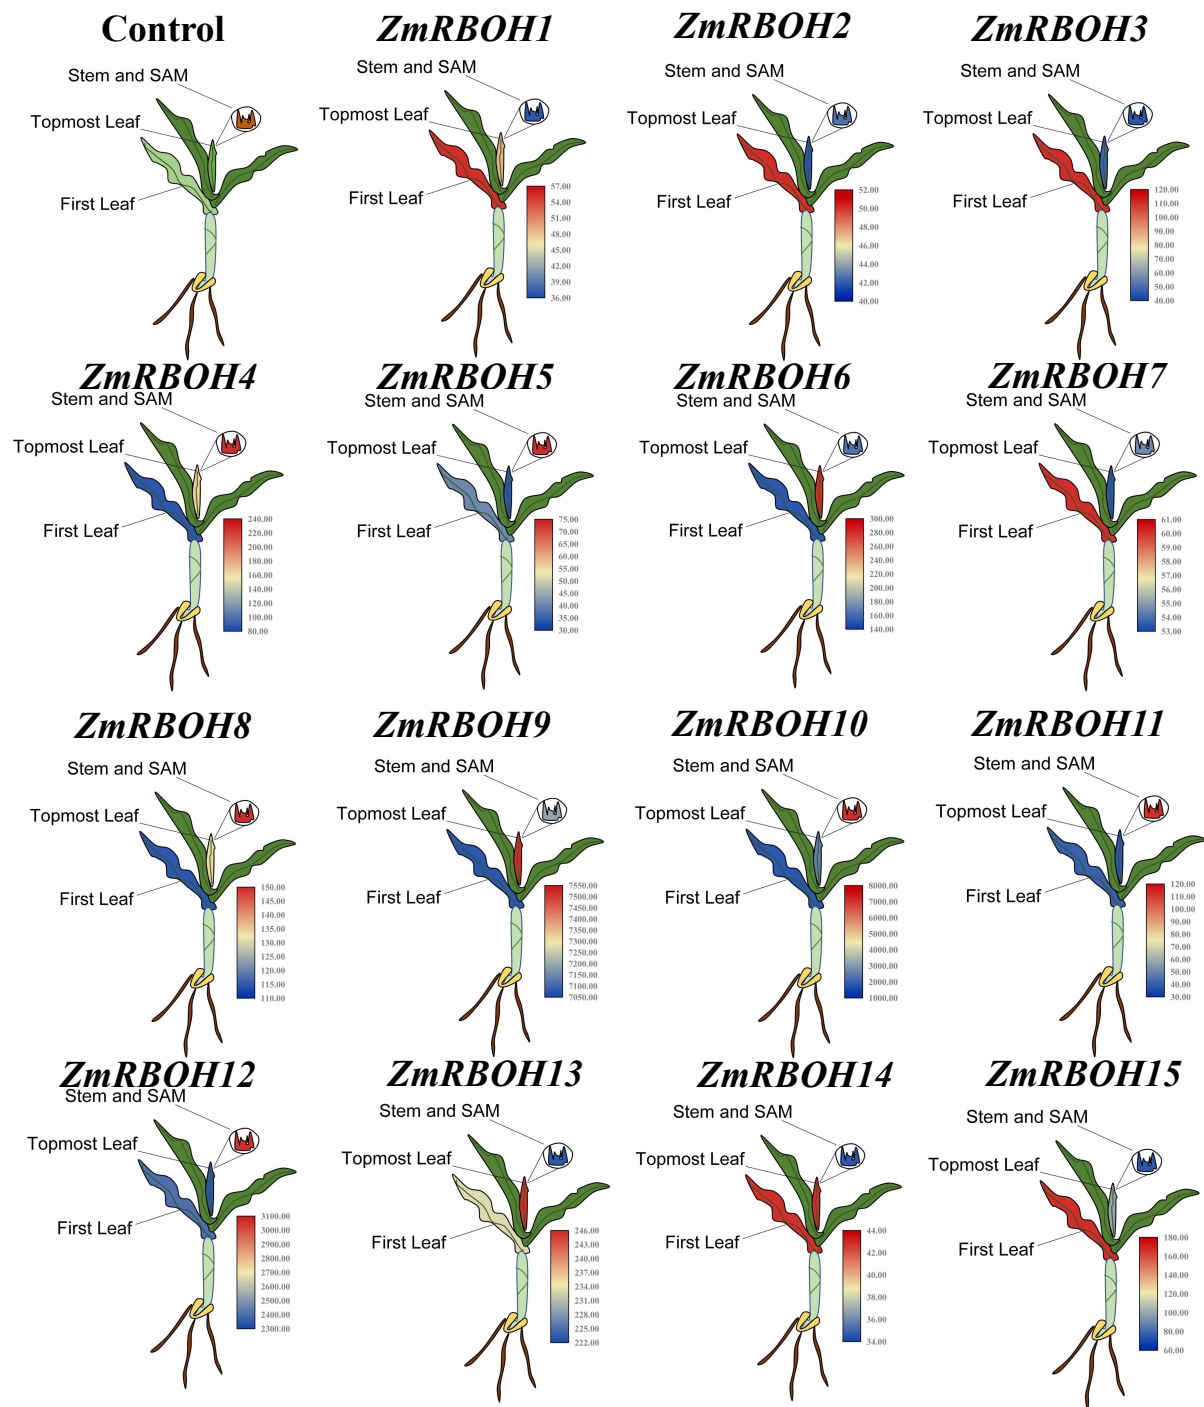

**Figure S6.** Heatmaps of phenotype simulation of *ZmRBOH* genes in V2 stage of maize.

Supplement: s1 [file s1]

**Figure S5.** *Cis*-elements in the promoters of *ZmRBOH* genes.

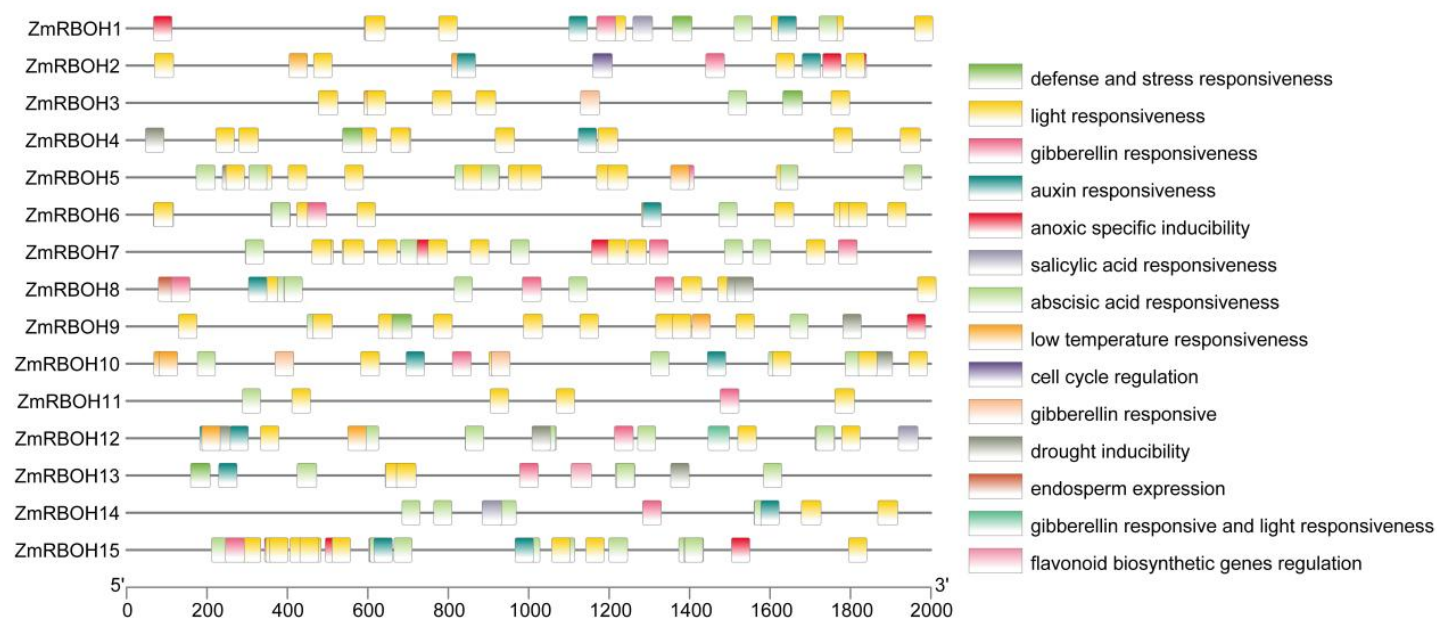

Supplement: s1 [file s1]

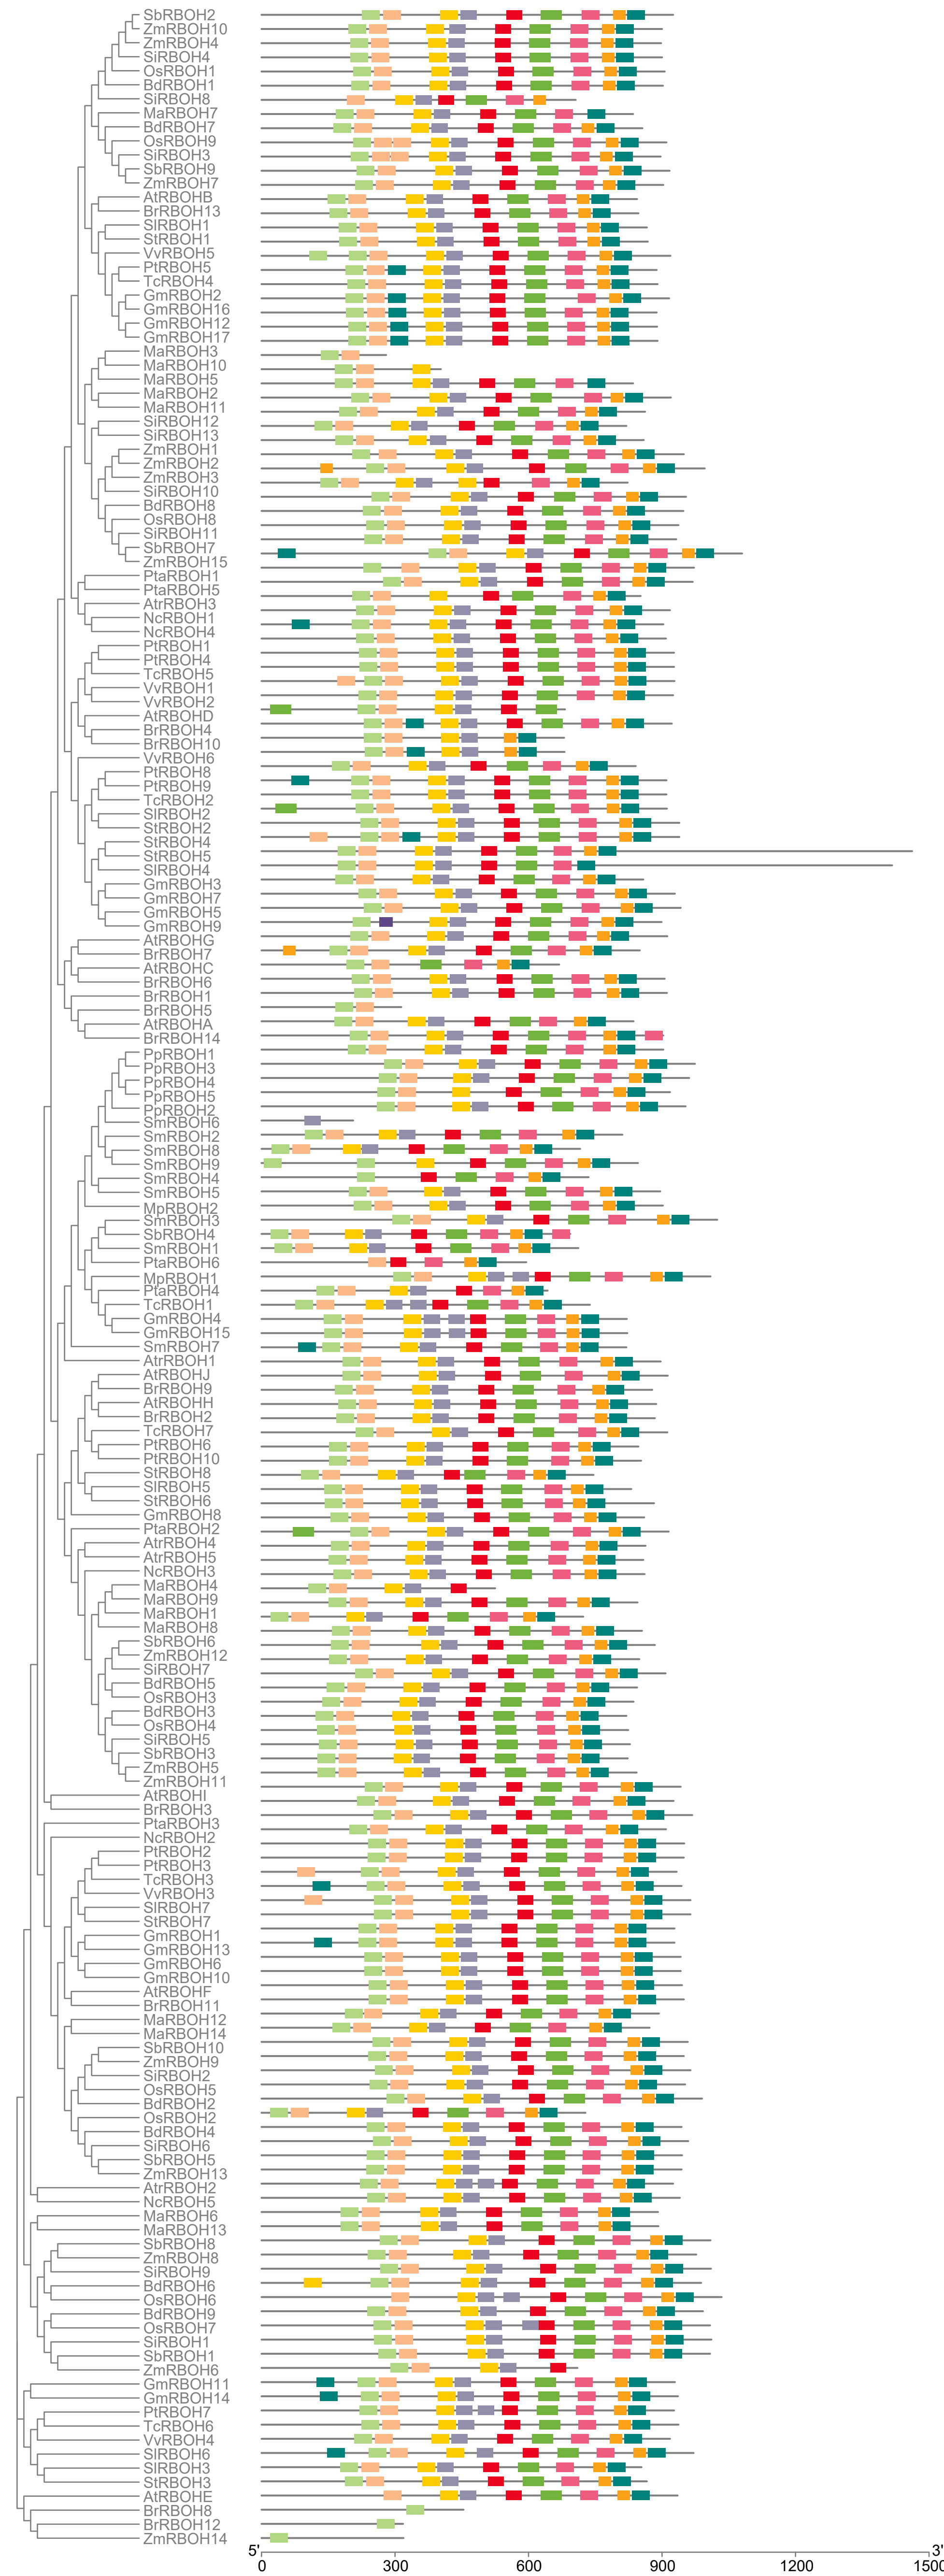

Figure S3. Conserved motifs in RBOH proteins of 20 species.

Supplement: s1 [file s1]
